# Supplementary material for: Preparation of high-performance toluene adsorbents by sugarcane bagasse carbonization combined with surface modification
Source: Royal Society of Chemistry journal article supplement (doi:10.1039/d0ra02225j), 2020-01-01
Supplement: d0ra02225j1.pdf [file d0ra02225j1.pdf]

## Supplemental materials

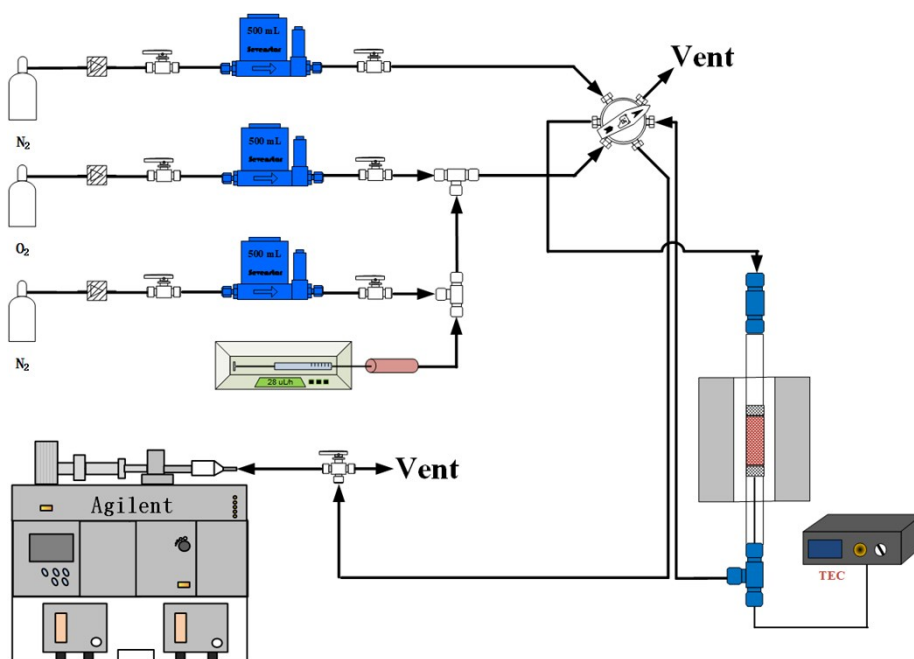

**Fig. S1** Scheme of the experimental setup

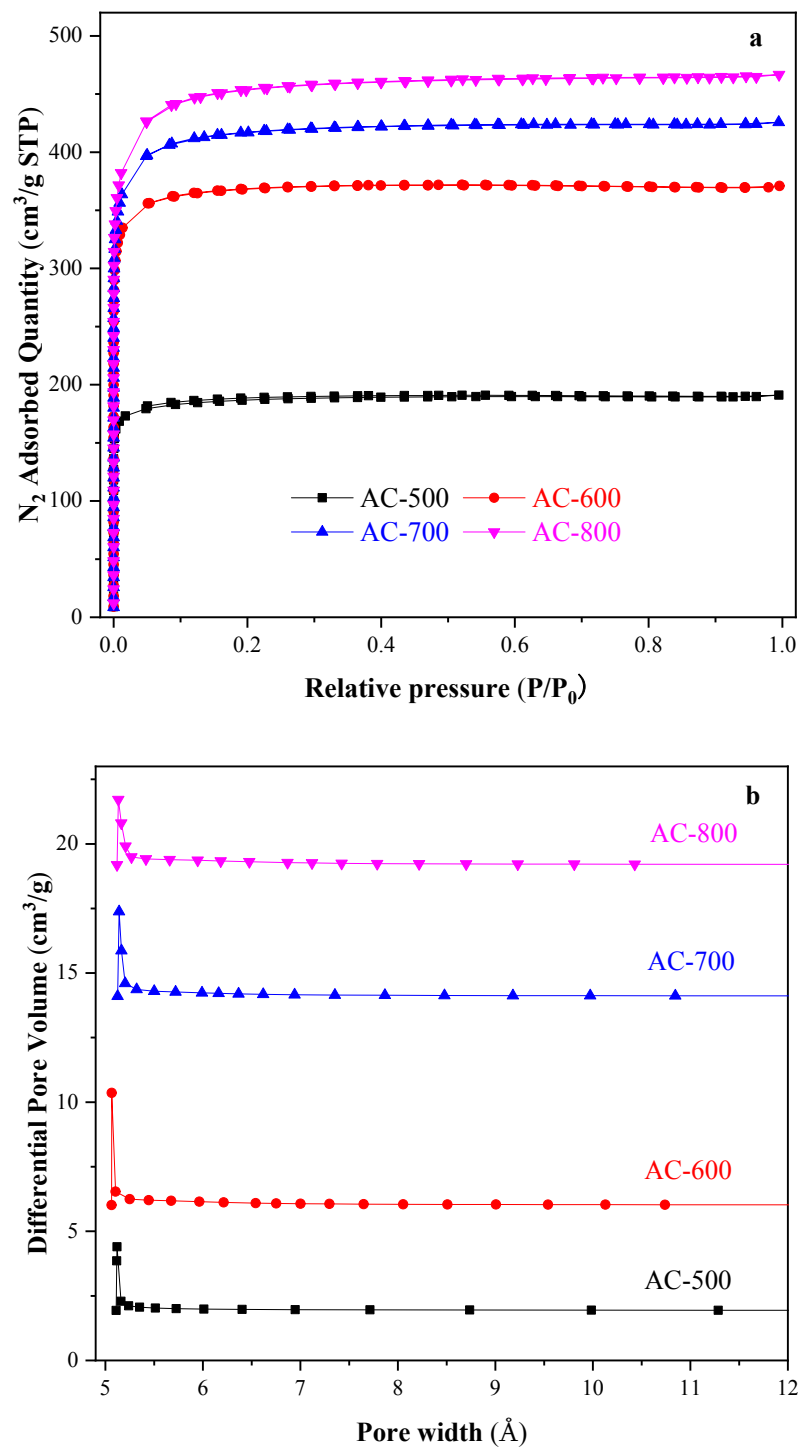

**Fig. S2.** N<sub>2</sub> adsorption/desorption isotherms (a) and pore size distributions (b) of ACs

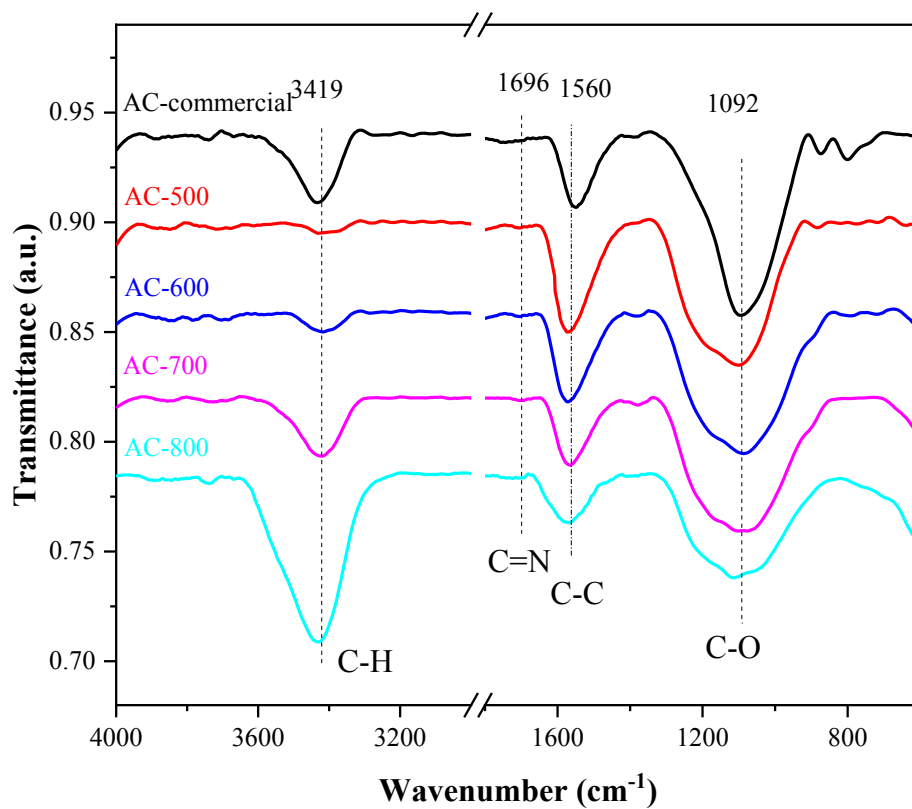

**Fig. S3** FTIR spectra of the as-prepared ACs.

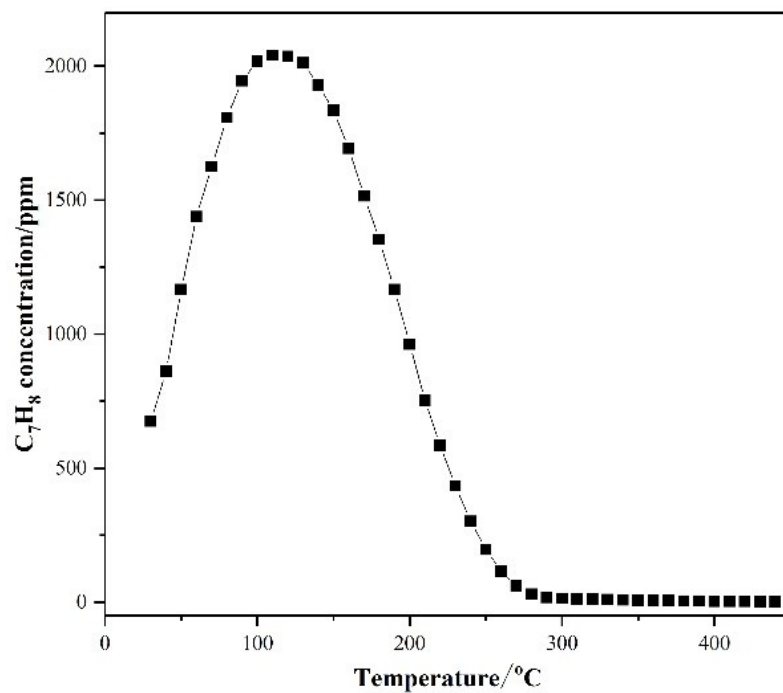

**Fig. S4.** Desorption curves of AC-800

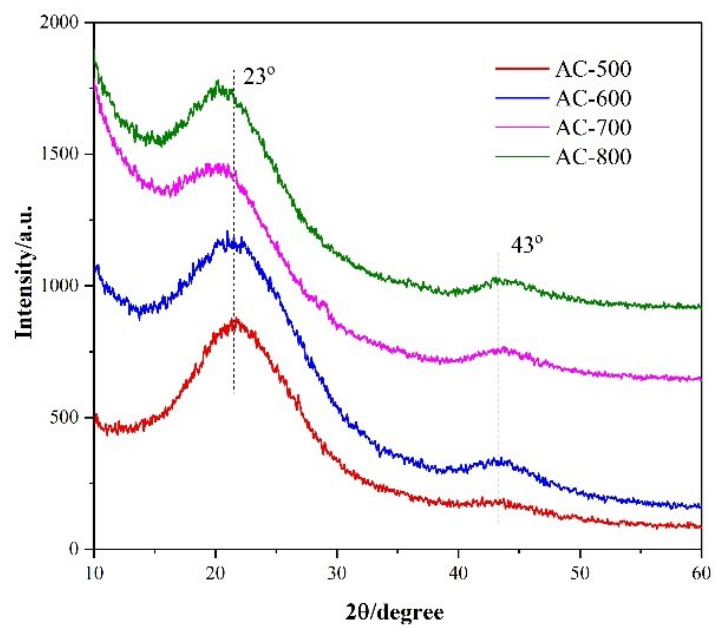

**Fig. S5.** XRD patterns of activated carbon
